# Supplementary material
Source: publisher figshare collection journal article supplement (https://frontiersin.figshare.com/ndownloader/files/24560324)
Supplement: Supplementary file 1 [file 24560324]

# Supplementary Table 2. Nutrient (N, P, K, Ca, Mg, and S) concentrations in the upland rice leaves as affected by cropping systems, sidedress nitrogen rates and growing season.

| Treatment | N | P | K | Ca | Mg | S |
| --- | --- | --- | --- | --- | --- | --- |
| Cropping systems | g kg–1 | | | | | |
| Monocropped rice | 30 a§ | 2.6 a | 20 a | 4.6 a | 2.6 a | 2.1 a |
| Rice + palisadegrass | 29 ab | 2.5 b | 19 b | 4.4 a | 2.5 a | 2.0 a |
| Rice + guineagrass | 28 b | 2.3 c | 19 b | 4.5 a | 2.5 a | 2.0 a |
| Growing season |  |  |  |  |  |  |
| 2011-2012 | 29 a | 2.6 a | 21 a | 4.1 b | 2.4 b | 2.1 a |
| 2012-2013 | 29 a | 2.4 b | 19 b | 4.8 a | 2.5 b | 2.0 a |
| 2014-2015 | 28 a | 2.4 b | 18 c | 4.8 a | 2.6 a | 2.0 a |
| ANOVA (*F probability*) |  |  |  |  |  |  |
| Cropping systems (CS) | 0.0025 | <0.0001 | <0.0001 | 0.5609 | 0.2581 | 0.0921 |
| Nitrogen rates (NR) | <0.0001 | 0.2912 | 0.3592 | 0.0780 | 0.2023 | 0.2934 |
| Growing season (GS) | 0.1719 | <0.0001 | <0.0001 | <0.0001 | 0.0009 | 0.3635 |
| CS x NR | 0.7506 | 0.1412 | 0.5562 | 0.7426 | 0.0615 | 0.8514 |
| CS x GS | 0.7211 | 0.6891 | 0.9277 | 0.3215 | 0.6210 | 0.9305 |
| NR x GS | 0.8800 | 0.7852 | 0.6214 | 0.1797 | 0.5532 | 0.6251 |
| CS x NR x GS | 0.6774 | 0.4130 | 0.5624 | 0.1483 | 0.2995 | 0.9852 |

§Values followed by the same letter are not significantly different at p ≤ 0.05 according to the LSD test.
